# Supplementary material for: Introducing the Dendrify framework for incorporating dendrites to spiking neural networks
Source: PubMed Central journal article supplement (PMC9832130; doi:10.1038/s41467-022-35747-8), 2023-01-10
Supplement: 41467_2022_35747_MOESM1_ESM.pdf [file 41467_2022_35747_MOESM1_ESM.pdf]

# Introducing the Dendrify framework for incorporating dendrites to spiking neural networks

## Supplementary Methods

### Simulation accuracy and numerical stability analysis

Biophysically and morphologically detailed models are very stiff systems of equations that require complex implicit numerical methods to solve<sup>4</sup>. However, Dendrify currently depends on Brian's explicit [integration methods](#) to solve the equations of the reduced compartmental models. While this approach offers good simulation performance, it also comes with two limitations:

- a. The number of a neuron's compartments should be small
- b. The simulation's time step (dt) should also be small (not above the 0.05 - 0.1 ms range commonly used)

Nevertheless, with Dendrify, we aim to simply extend the "point-neuron" idea by adding a few compartments that account for specific regions in the dendritic morphology. Thus, our approach typically results in reduced compartmental neuron models that share these characteristics:

1. They have small compartments (usually around 3-5).
2. Each compartment can be quite long (>100  $\mu\text{m}$ ).
3. Each compartment is not divided into segments; thus, the number of segments is equal to the number of compartments.

Since Dendrify is commonly used for neuron models with a small number of big compartments, we expect that explicit approaches and a reasonable simulation time step would not cause any substantial numerical issues. To test this hypothesis, we directly compared Dendrify against SpatialNeuron (which utilizes an implicit method) using an adapted version of the 4-compartment model shown in **Fig. 3** and a challenging simulation protocol (see below).

### Test details:

- A very high frequency (300 Hz) Poisson input is provided to the most distal dendritic compartment.
- This input generates synaptic currents of fast kinetics (instant rise and 2 ms decay time constant).
- The synaptic weight is large enough to cause robust somatic activation (~8 Hz). Typically, inputs to distal branches of pyramidal neurons fail to do that.

- Simulation time step: Ranged from 0.5 ms or 0.1
- We tested five of Brian's integration methods (Forward Euler, Exponential Euler, 2<sup>nd</sup> order Runge-Kutta, 4<sup>th</sup> order Runge-Kutta, and Heun's rule).

## Supplementary Figures

```

1 import brian2 as b
2 from brian2.units import *
3 from dendrify import Soma, Dendrite, NeuronModel
4
5 # create soma
6 soma = Soma('soma', model='leakyIF', length=25*um, diameter=25*um)
7
8 # create apical dendrite
9 apical = Dendrite('apical', length=250*um, diameter=2*um)
10
11 # create basal dendrite
12 basal = Dendrite('basal', length=150*um, diameter=2*um)
13
14 # add noise to dendrites
15 apical.noise(tau=20*ms, sigma=3*pA, mean=0*pA)
16 basal.noise(tau=20*ms, sigma=3*pA, mean=0*pA)
17
18 # add synapses
19 apical.synapse('AMPA', pre='cortex', g=1*nS, t_decay=2*ms)
20 apical.synapse('NMDA', pre='cortex', g=1*nS, t_decay=60*ms)
21
22 # merge the compartments into a NeuronModel and set its basic properties
23 edges = [(soma, apical, 10*nS), (soma, basal, 10*nS)]
24 pyr_model = NeuronModel(edges, cm=1*uF/(cm**2), gl=50*uS/(cm**2),
25                          v_rest=-70*mV, r_axial=150*ohm*cm,
26                          scale_factor=3, spine_factor=1.5)
27
28 # create a Brian NeuronGroup and link it to the NeuronModel
29 pyr_group = b.NeuronGroup(4, model=pyr_model.equations, method='euler',
30                           threshold='V_soma > -40*mV', reset='V_soma = -50*mV',
31                           refractory=3*ms, namespace=pyr_model.parameters)
32 pyr_model.link(pyr_group)

```

**Supplementary Figure 1 | Python code for the neuron model in Figure 2.** *Dendrify* applies a standardized approach for describing the architecture, mechanisms, and parameters of simplified compartmental models. This approach involves creating *Soma/Dendrite* objects ([lines 6, 9, 12](#)) representing the model's compartments. Here, soma acts as the primary spiking unit (leaky I&F), while dendrites are simulated (by default) as passive leaky integrators. Users can specify each compartment's physical dimensions, which are used to calculate its surface area. Moreover, *Dendrify* allows adding any desired mechanism (dendritic, synaptic, or other) to a

single compartment, such as Gaussian noise (lines 15, 16) and synaptic currents (lines 19, 20). Users can specify the coupling strength between the adjacent compartments (line 23); otherwise, it is inferred from the model parameters (see Methods). Finally, we introduce another object, the *NeuronModel* (line 24), which has four primary functions: a) to group related *Compartment* objects into a single model, b) to allow setting global model parameters, c) to extract model equations, properties, and custom events, d) to allow deeper integration with *Brian 2*, which unlocks several automations (line 32). Upon creating a *NeuronModel*, users can easily construct a *NeuronGroup* (line 29 - a group of neurons that share the same equations and properties), *Brian's* core object of every simulation. The entire simulation code and detailed *Dendrify* examples are freely available on [GitHub](#). For more information, see the Methods section and the *Brian 2* documentation: <https://brian2.readthedocs.io/en/stable>.

```

1 import brian2 as b
2 from brian2.units import *
3 from dendrify import Soma, Dendrite, NeuronModel
4
5 # create soma
6 soma = Soma('soma', model='leakyIF', length=25*um, diameter=25*um )
7
8 # create trunk
9 trunk = Dendrite('trunk', length=100*um, diameter=2.5*um)
10 trunk.dspikes('Na', threshold=-35*mV, g_rise=34*nS, g_fall=27.2*nS)
11
12 # create proximal dendrite
13 prox = Dendrite('prox', length=100*um, diameter=1*um)
14 prox.synapse('AMPA', pre='pathY', g=0.8*nS, t_decay=2*ms)
15 prox.synapse('NMDA', pre='pathY', g=0.8*nS, t_decay=60*ms)
16 prox.dspikes('Na', threshold=-35*mV, g_rise=15.3*nS, g_fall=12.24*nS)
17
18 # create distal dendrite
19 dist = Dendrite('dist', length=100*um, diameter=0.5*um)
20 dist.synapse('AMPA', pre='pathX', g=0.8*nS, t_decay=2*ms)
21 dist.synapse('NMDA', pre='pathX', g=0.8*nS, t_decay=60*ms)
22 dist.dspikes('Na', threshold=-35*mV, g_rise=7*nS, g_fall=5.6*nS)
23
24 # merge the compartments into a NeuronModel and set its basic properties
25 edges = [(soma, trunk, 15*nS), (trunk, prox, 10*nS), (prox, dist, 4*nS)]
26 pyr_model = NeuronModel(edges, cm=1*uF/(cm**2), gl=40*uS/(cm**2),
27                          v_rest=-70*mV, r_axial=150*ohm*cm,
28                          scale_factor=2.8, spine_factor=1.5)
29
30 # set dSpike properties
31 pyr_model.dspike_properties('Na', tau_rise=0.6*ms, tau_fall=1.2*ms,
32                             refractory=5*ms, offset_fall=0.2*ms)
33
34 # create a Brian NeuronGroup and link it to the NeuronModel
35 pyr_group = b.NeuronGroup(1, model=pyr_model.equations, method='euler',
36                           threshold='V_soma > -40*mV', reset='V_soma = 40*mV',
37                           refractory=4*ms, events=pyr_model.events,
38                           namespace=pyr_model.parameters)
39 pyr_model.link(pyr_group)

```

**Supplementary Figure 2 | Python code for the model shown in Figure 3.** The code shown here follows the same principles described in **Supplementary Fig. 1**. In addition, we introduce another feature of *Dendrify*, which is the option to add a dendritic spiking mechanism to *Dendrite* objects (lines 10, 16, 22). Dendritic spiking is modeled in an event-driven fashion, miming the rising and falling phase of dSpikes caused by the sequential activation of inward  $\text{Na}^+$  (or  $\text{Ca}^{2+}$ ) and outward  $\text{K}^+$  currents (**Fig. 3g**, also see Methods). Users can specify the dSpike threshold and the amplitudes of the inward ('g\_rise') and outward ('g\_fall') currents individually in each dendrite. Moreover, it is possible to set global dSpike properties (lines 31, 32), such as the decay time constants for the rise and the fall phases, the temporal delay of the fall phase (offset\_fall), and a dSpike refractory period.

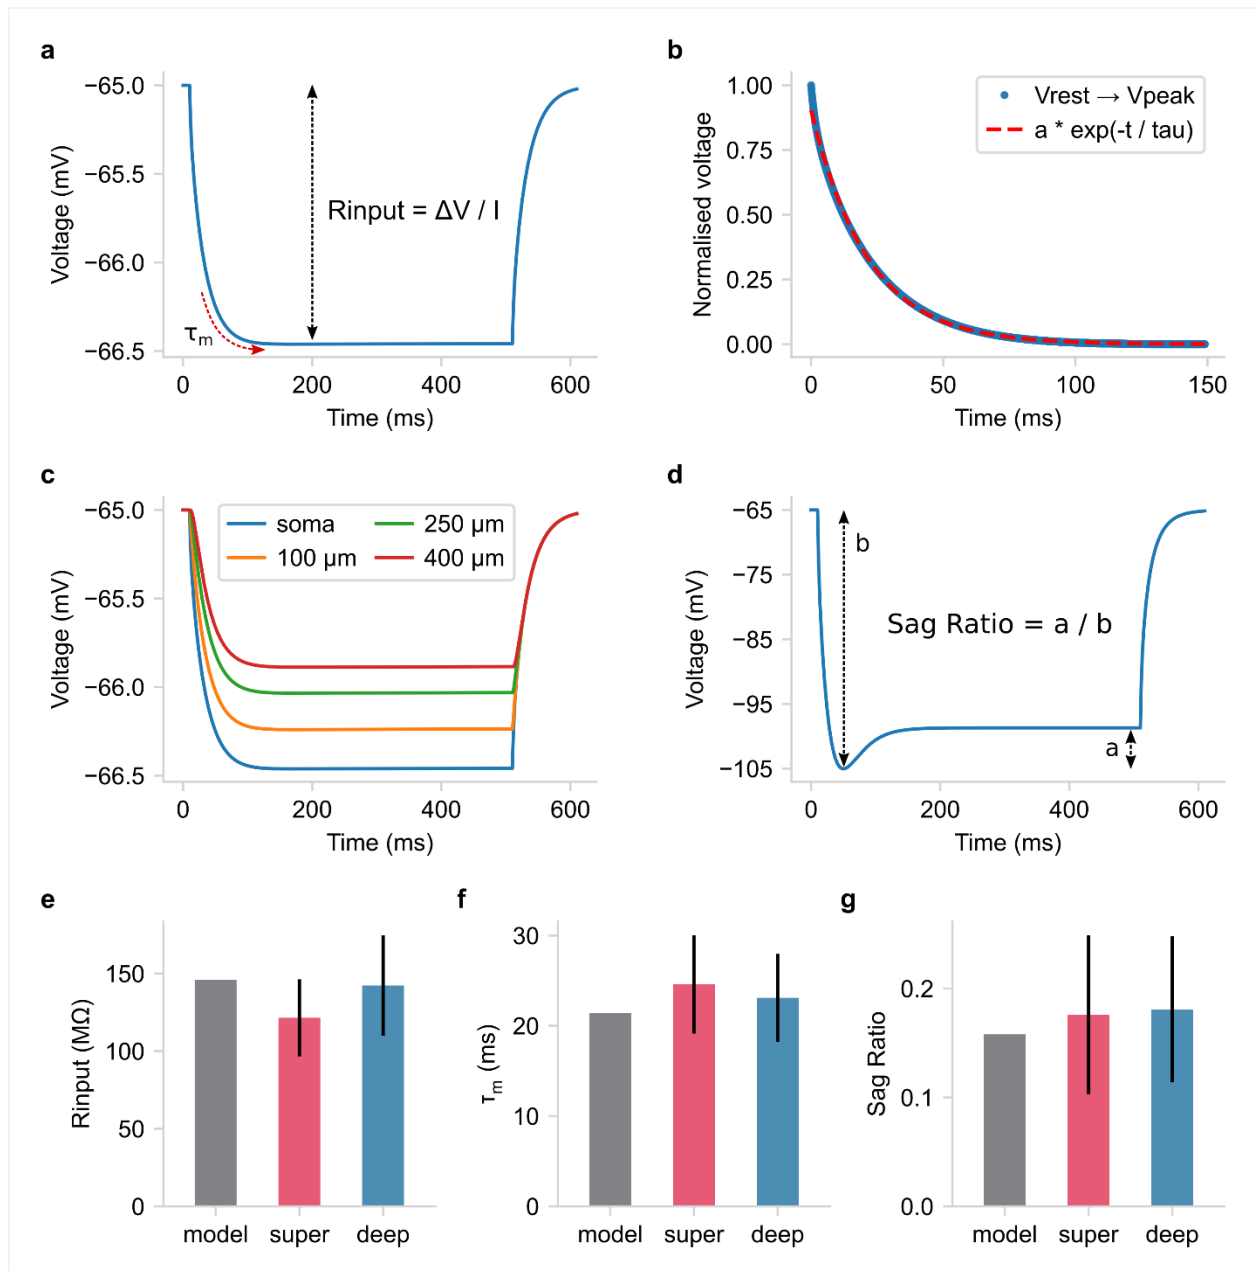

**Supplementary Figure 3 | Validation of the passive CA1 PC model properties (relevant to Fig. 4).** **a-c)** Estimating various model properties by replicating an experimental<sup>1</sup>, light somatic stimulation protocol (500 ms long somatic current injection of -10 pA amplitude). **a)** Schematic showing the somatic voltage trace used to calculate input resistance ( $R_{in}$ ). **b)** The membrane time constant ( $\tau_m$ ) was measured by fitting a monoexponential to the somatic membrane hyperpolarization. **c)** Somatic and dendritic voltage traces used to estimate the steady-state, distance-dependent voltage attenuation. **d)** Schematic showing the measurement of the sag ratio by using a strong somatic stimulation protocol<sup>1</sup> to elicit the sag response (500 ms long current injection of -394 pA amplitude to bring the somatic voltage to -105 mV). **e-g)** Comparing model

properties against experimental *in vitro* data<sup>1</sup> regarding deep and superficial PCs of the CA1b Hippocampal region. The experimental values are depicted as means  $\pm$  std ( $N_{\text{super}} = 29$ ,  $N_{\text{deep}} = 27$ ).

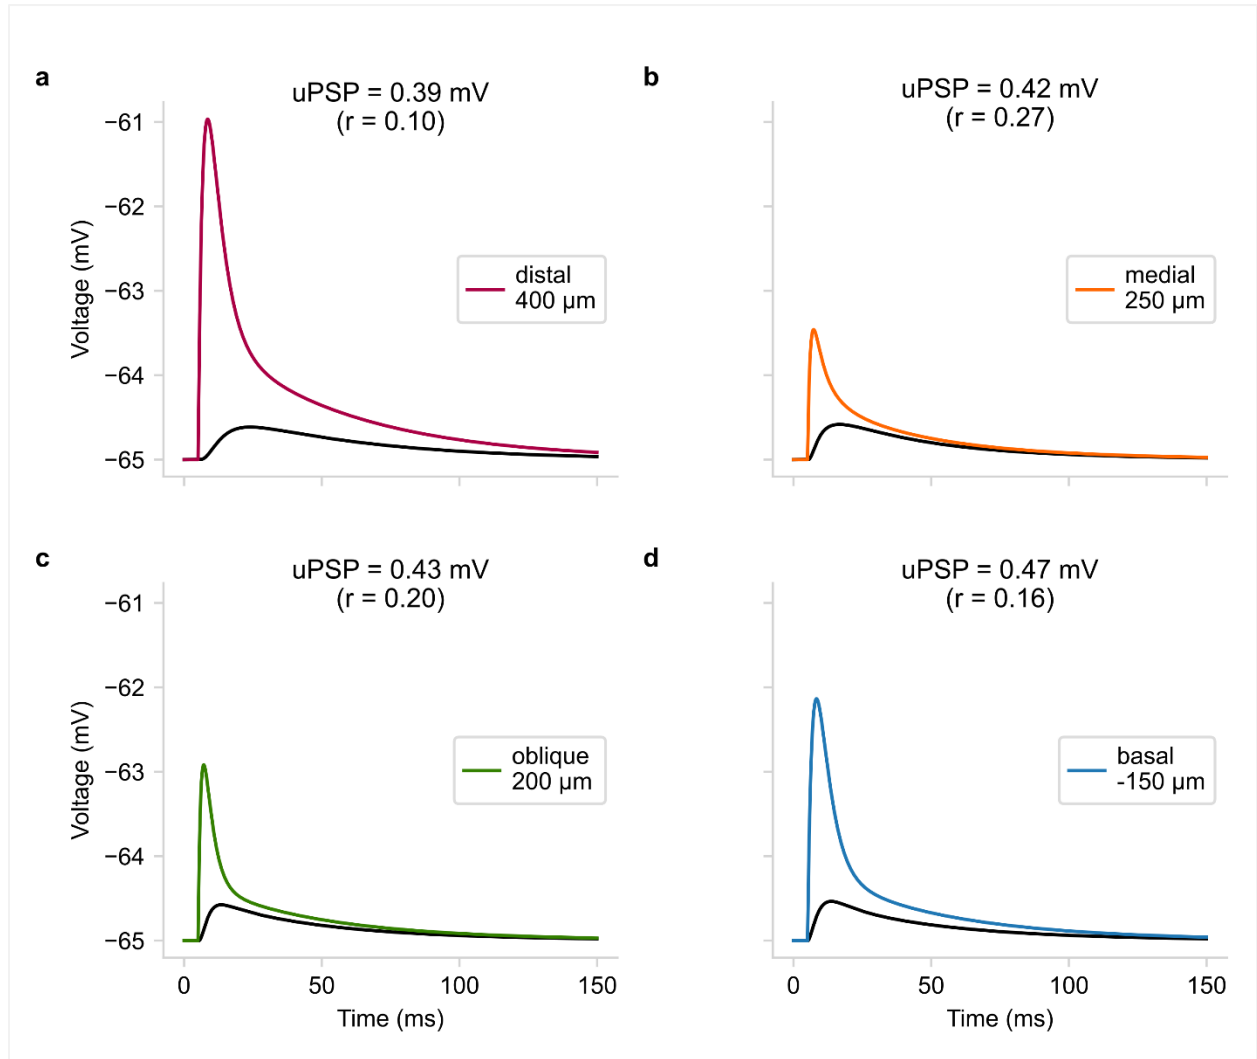

**Supplementary Figure 4 | Unitary synaptic responses of the CA1 PC model (relevant to Fig. 4).**

**a-d)** Overlay of the dendritic (colored) and the respective somatic (black) voltage responses when a single excitatory synapse (AMPA & NMDA currents) is activated at a distal branch 400  $\mu\text{m}$  from soma (**a**), the medial branch 250  $\mu\text{m}$  from soma (**b**), an oblique branch 200  $\mu\text{m}$  from soma (**c**), a basal branch 150  $\mu\text{m}$  from soma (**d**). Synaptic conductances ( $g_{\text{AMPA}}$ ,  $g_{\text{NMDA}}$ ) were manually adjusted to achieve realistic somatic responses<sup>2</sup>. uPSP: somatic unitary postsynaptic potential. r: the ratio of the somatic to the dendritic peak voltage response ( $\Delta V_{\text{soma}} / \Delta V_{\text{dend}}$ ).

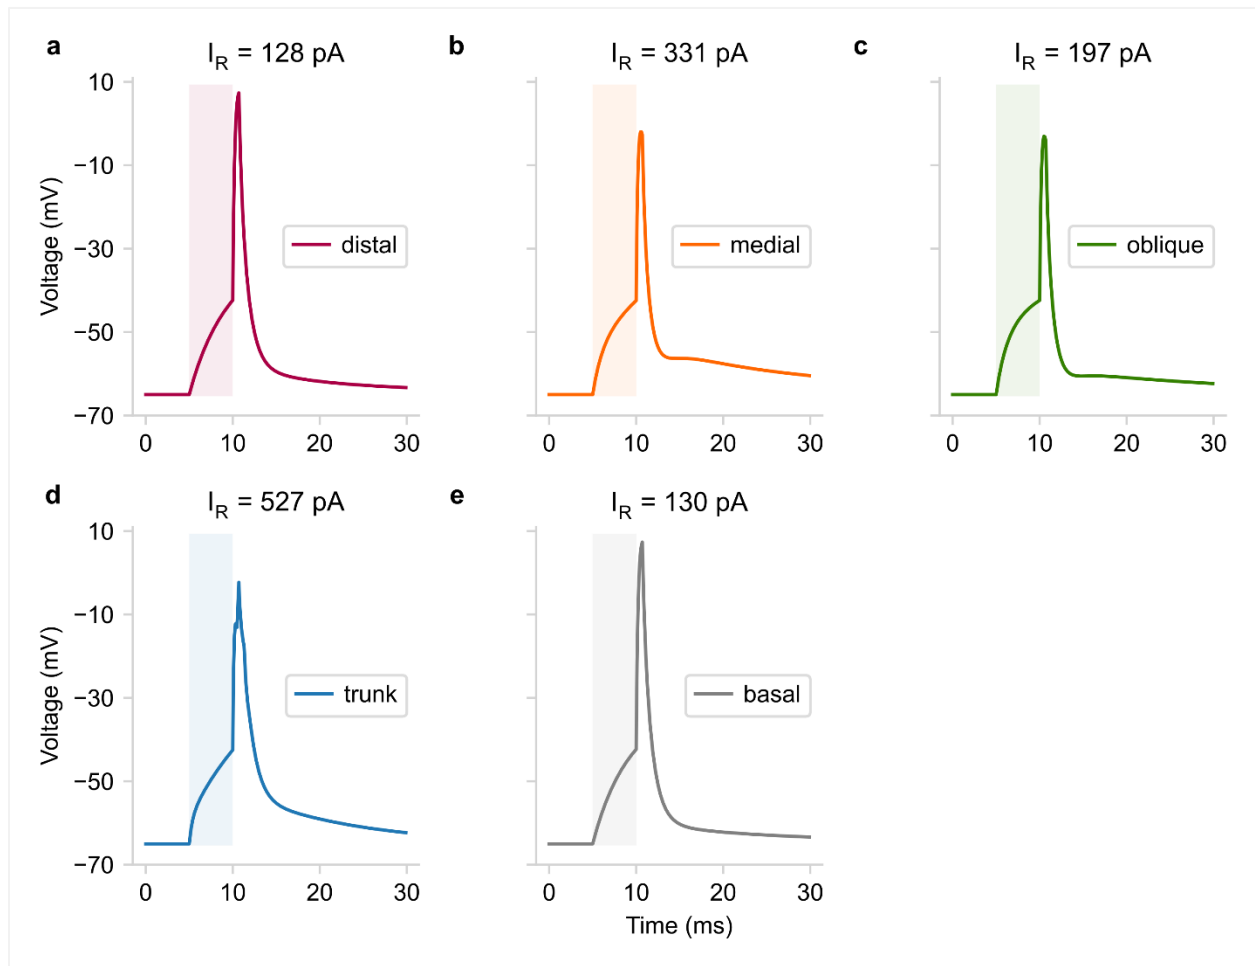

**Supplementary Figure 5 | Dendritic spiking in the CA1 PC model (relevant to Fig. 6).** a-e) Dendritic voltage responses when constant current of Rheobase amplitude is injected directly into a distal branch (a), the medial branch (b), an oblique branch (c), the trunk (d), and a basal branch (e). Notice that larger compartments such as the the trunk (d) require significantly more current ( $I_R$ ) to generate a single dSpike than smaller compartments as the distal branches (a). Shaded boxes: show the 5 ms long stimulation period (square current pulse).  $I_R$ : Rheobase current for evoking a single dendritic current.



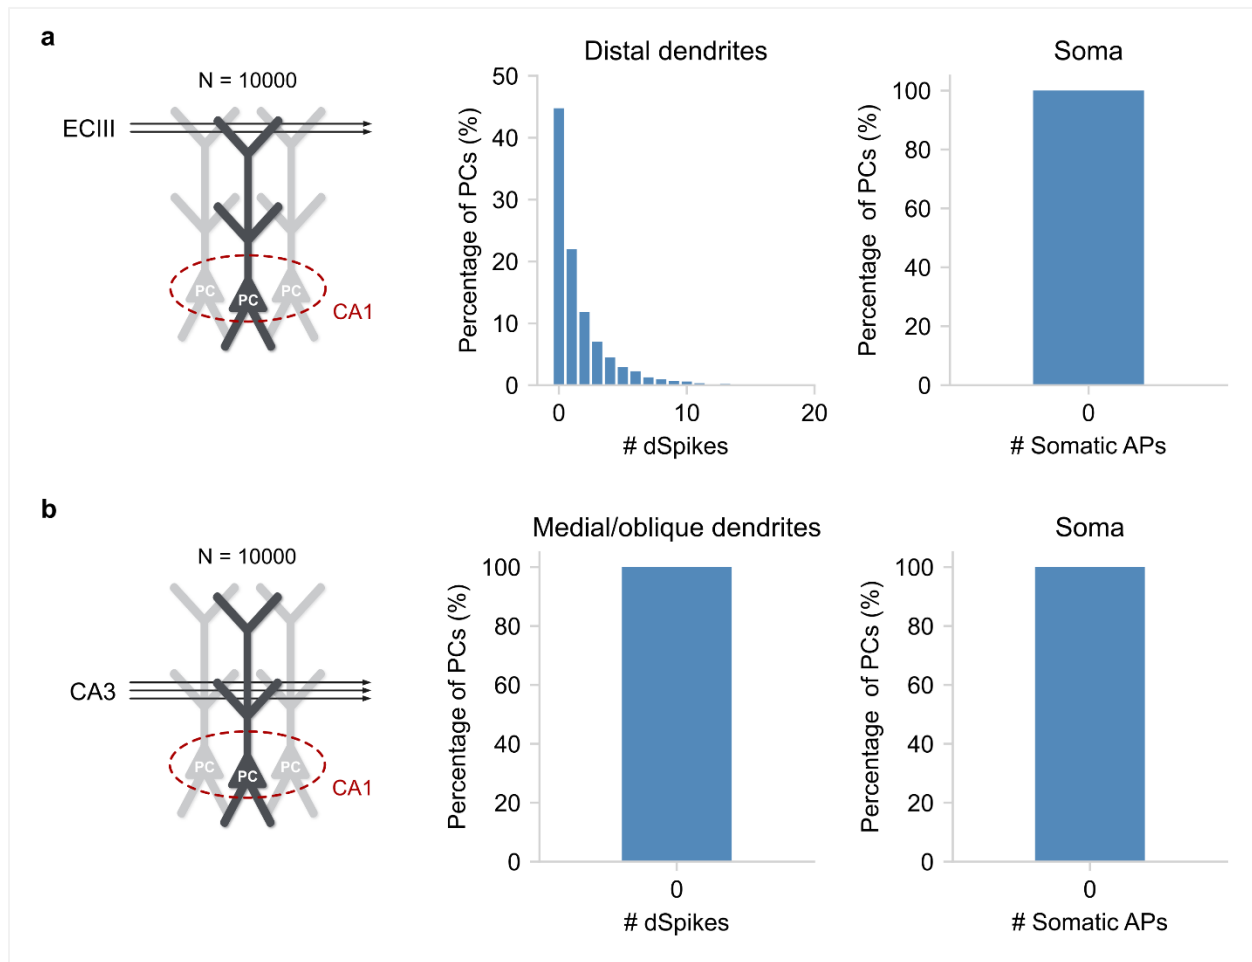

**Supplementary Figure 6 | Single pathway effect on somatic and dendritic spiking (relevant to Fig. 5). a)** When only the ECIII input is administered to a pool of 10,000 PCs, more than half (~55%) will generate at least a single dSpikes in one of their distal dendrites. However, due to strong dendritic attenuation, the effect on somatic output is negligible. **b)** When only the CA3 input is available, both the receiver dendrites (medial and oblique branches) and the soma produce subthreshold responses. Notably, both input pathways are simulated as independent Poisson processes, the rate of which is selected to mimic the experiments of Jarsky *et al.*<sup>3</sup>.

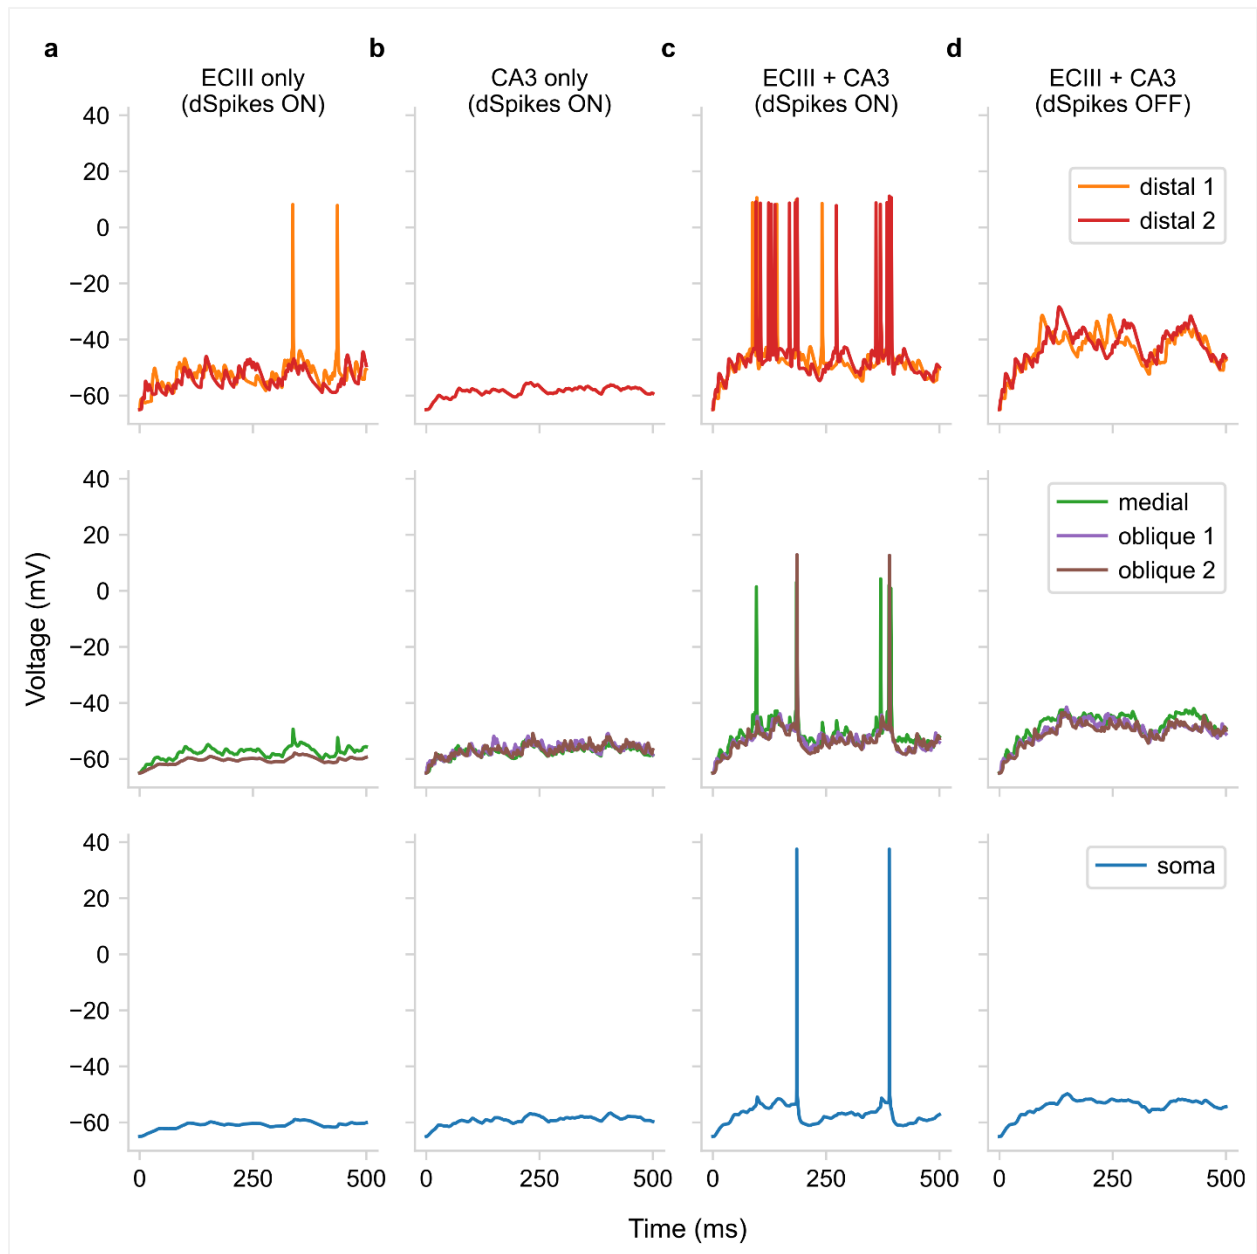

**Supplementary Figure 7 | Understanding the role of dendritic  $\text{Na}^+$  spikes in coincidence detection in CA1 PCs (relevant to Fig. 5).** **a)** When only the ECIII input pathway is active, distal dendrites can generate dSpikes that fail to propagate to the soma due to strong dendritic attenuation. **b)** When only the CA3 input pathway is active, it is not powerful enough to elicit any dendritic or somatic spikes. **c)** When both inputs to the ECIII and CA3 pathways are active, their synergistic effect results in strong dendritic activation that succeeds in activating the soma. **d)** Deactivating dendritic spiking inhibits also deactivates the somatic output even when both inputs to the ECIII and CA3 pathways are active.

300 Hz synaptic input to Dendrite 3  
(dt = 0.050 ms | method = euler)

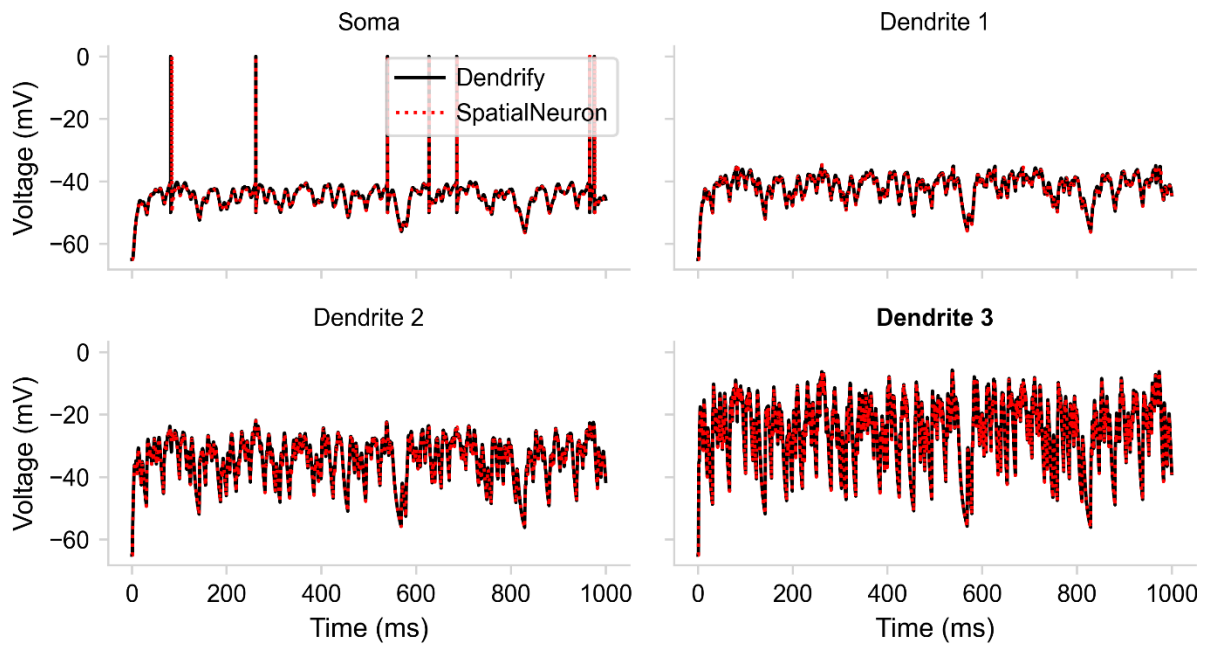

**Supplementary Figure 8 | Dendrify vs. SpatialNeuron when using dt = 0.05 ms and the Forward Euler integration method.** Voltage responses of all model compartments when high-frequency synaptic input (300 Hz) is provided to the most distal dendrite.

300 Hz synaptic input to Dendrite 3  
(dt = 0.100 ms | method = euler)

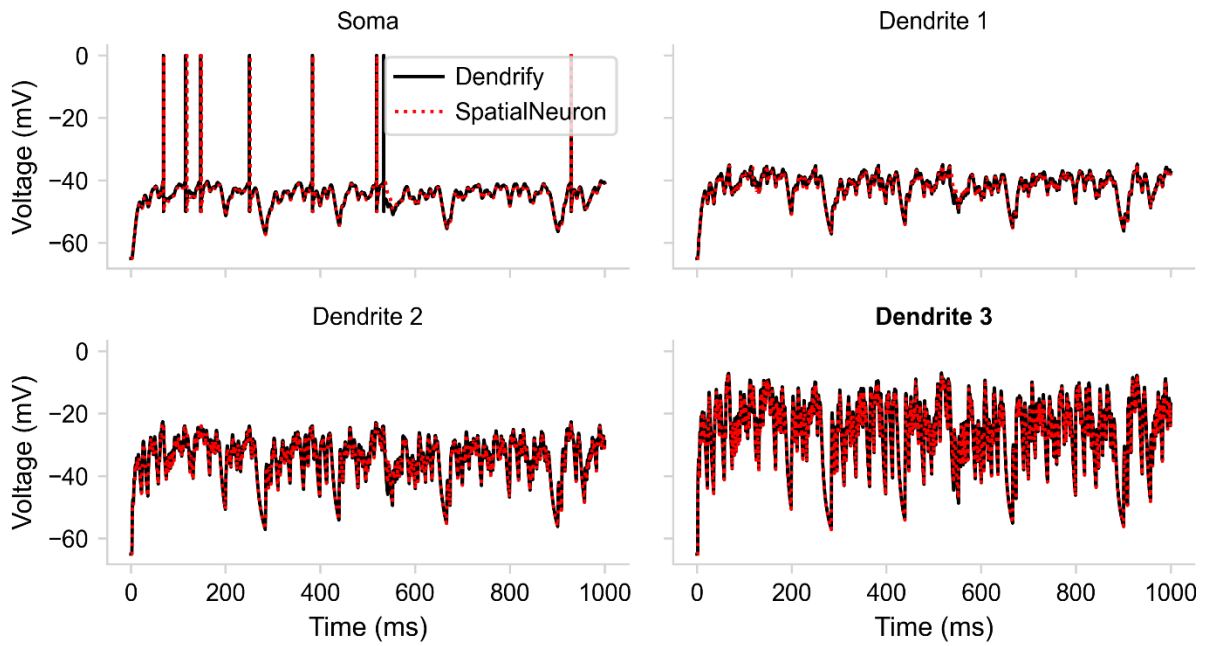

**Supplementary Figure 9 | Dendrifly vs. SpatialNeuron when using dt = 0.1 ms and the Forward Euler integration method.** Voltage responses of all model compartments when high-frequency synaptic input (300 Hz) is provided to the most distal dendrite.

300 Hz synaptic input to Dendrite 3  
(dt = 0.050 ms | method = exponential\_euler)

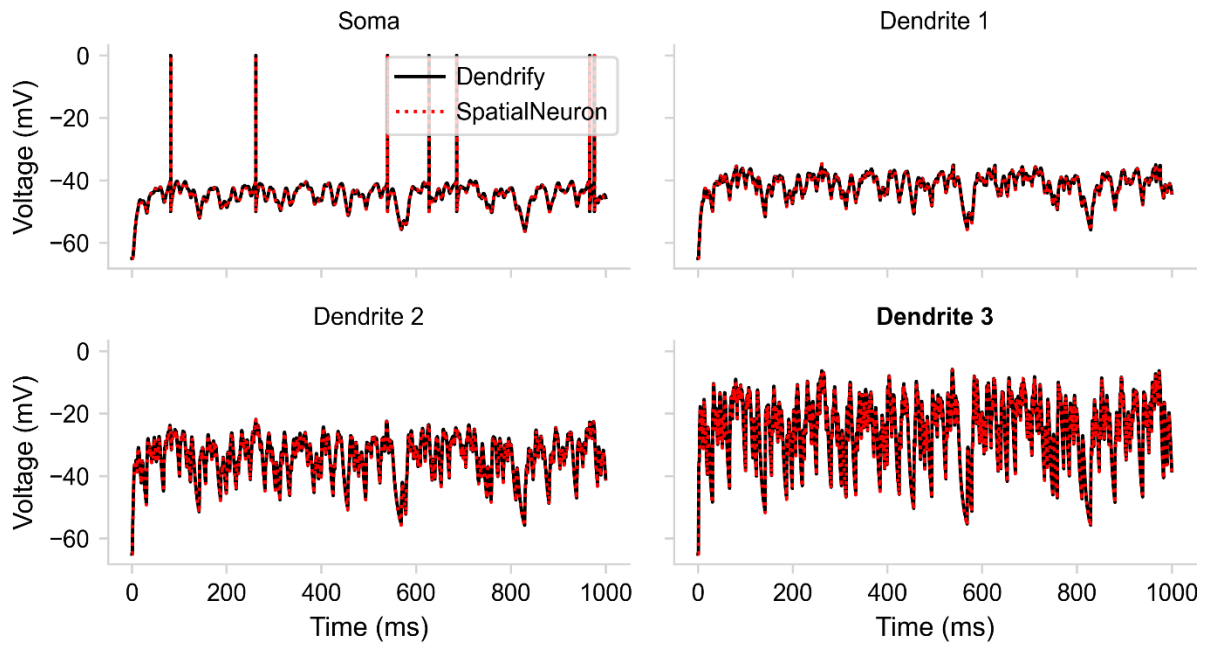

**Supplementary Figure 10 | Dendrify vs. SpatialNeuron when using dt = 0.05 ms and the Exponential Euler integration method.** Voltage responses of all model compartments when high-frequency synaptic input (300 Hz) is provided to the most distal dendrite.

300 Hz synaptic input to Dendrite 3  
(dt = 0.100 ms | method = exponential\_euler)

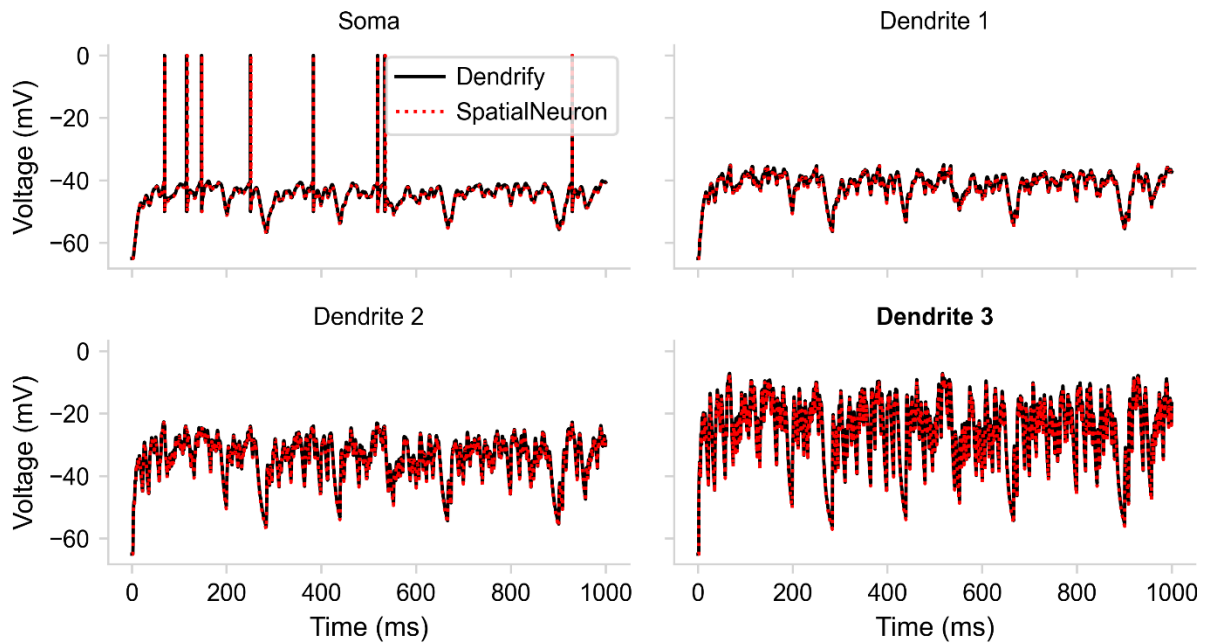

**Supplementary Figure 11 | Dendrify vs. SpatialNeuron when using dt = 0.1 ms and the Exponential Euler integration method.** Voltage responses of all model compartments when high-frequency synaptic input (300 Hz) is provided to the most distal dendrite.

300 Hz synaptic input to Dendrite 3  
(dt = 0.050 ms | method = rk2)

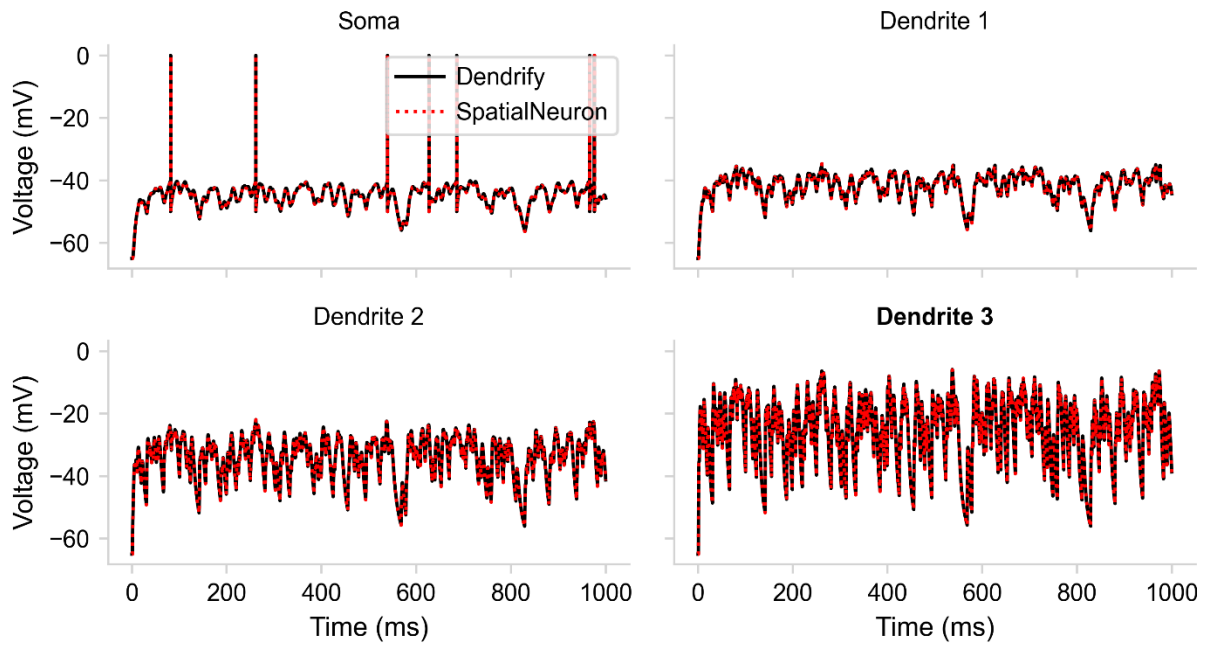

**Supplementary Figure 12 | Dendrify vs. SpatialNeuron when using dt = 0.05 ms and a 2<sup>nd</sup>-order Runge-Kutta integration method.** Voltage responses of all model compartments when high-frequency synaptic input (300 Hz) is provided to the most distal dendrite.

300 Hz synaptic input to Dendrite 3  
(dt = 0.100 ms | method = rk2)

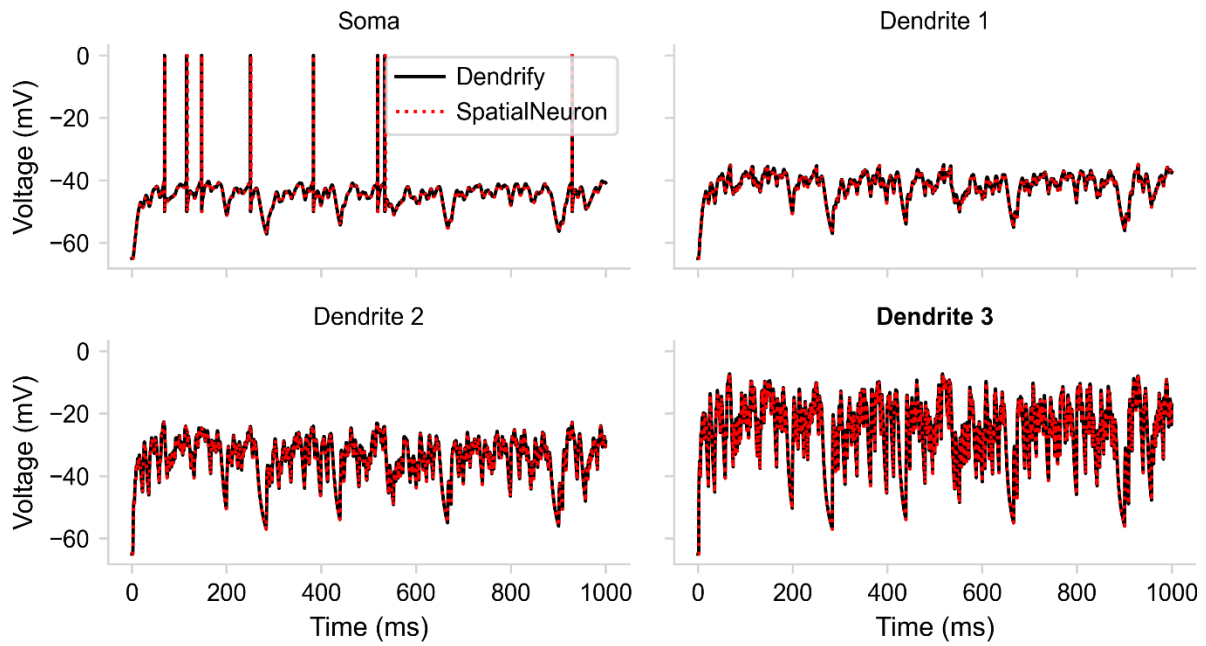

**Supplementary Figure 13 | Dendrifly vs. SpatialNeuron when using dt = 0.1 ms and a 2<sup>nd</sup>-order Runge-Kutta integration method.** Voltage responses of all model compartments when high-frequency synaptic input (300 Hz) is provided to the most distal dendrite.



300 Hz synaptic input to Dendrite 3  
(dt = 0.050 ms | method = heun)

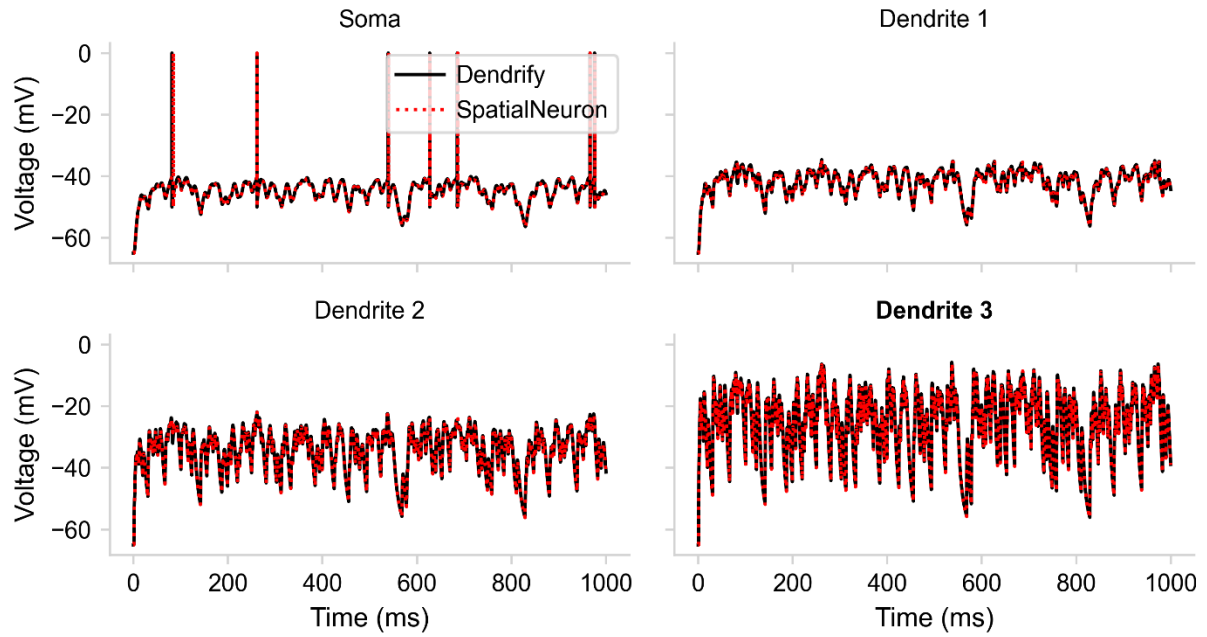

**Supplementary Figure 14 | Dendrifly vs. SpatialNeuron when using dt = 0.05 ms and Heun's integration method.** Voltage responses of all model compartments when high-frequency synaptic input (300 Hz) is provided to the most distal dendrite.

300 Hz synaptic input to Dendrite 3  
(dt = 0.100 ms | method = heun)

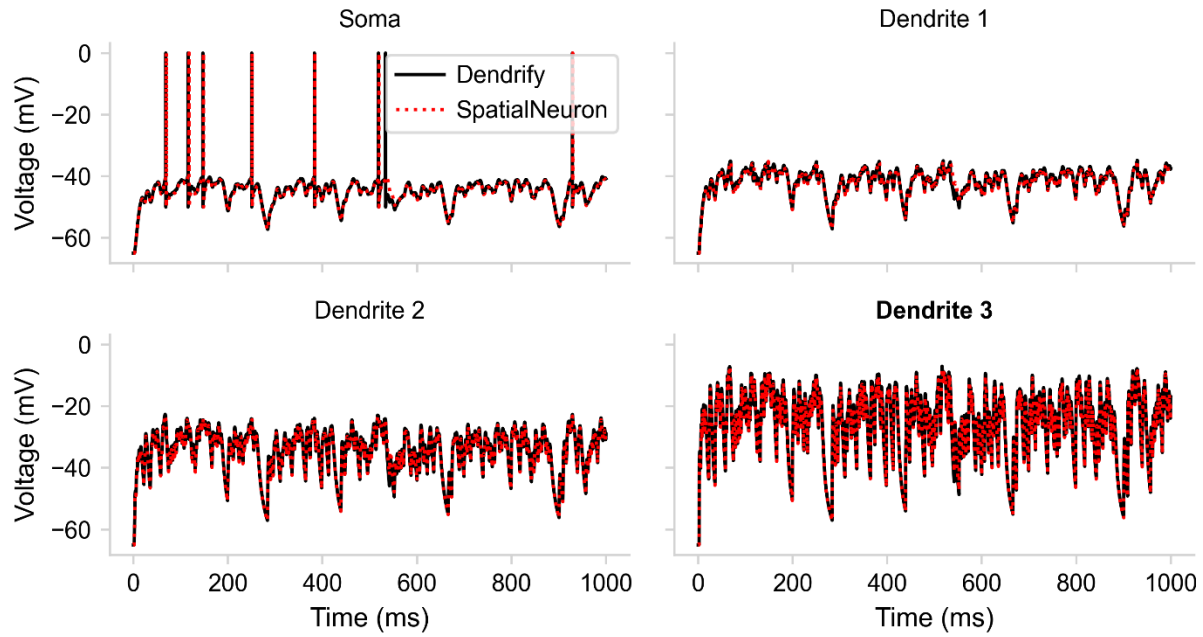

**Supplementary Figure 15 | Dendrify vs. SpatialNeuron when using dt = 0.1 ms and Heun's integration method.** Voltage responses of all model compartments when high-frequency synaptic input (300 Hz) is provided to the most distal dendrite.

300 Hz synaptic input to Dendrite 3  
(dt = 0.050 ms | method = rk4)

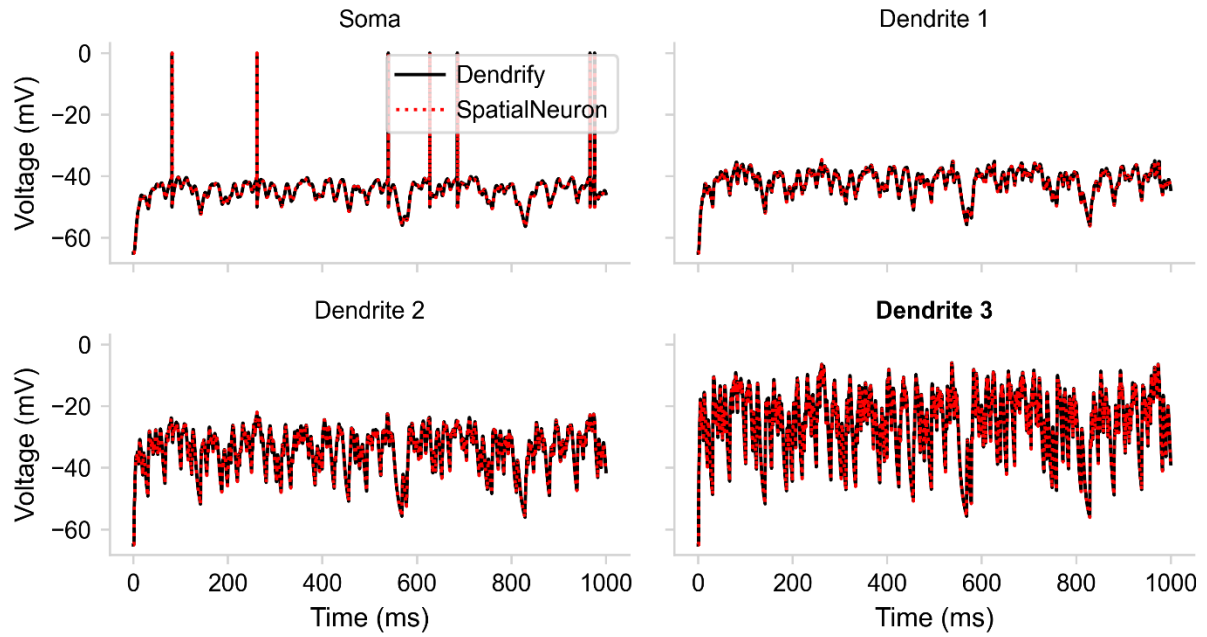

**Supplementary Figure 16 | Dendrify vs. SpatialNeuron when using dt = 0.05 ms and a 4<sup>th</sup>-order Runge-Kutta integration method.** Voltage responses of all model compartments when high-frequency synaptic input (300 Hz) is provided to the most distal dendrite.

300 Hz synaptic input to Dendrite 3  
(dt = 0.100 ms | method = rk4)

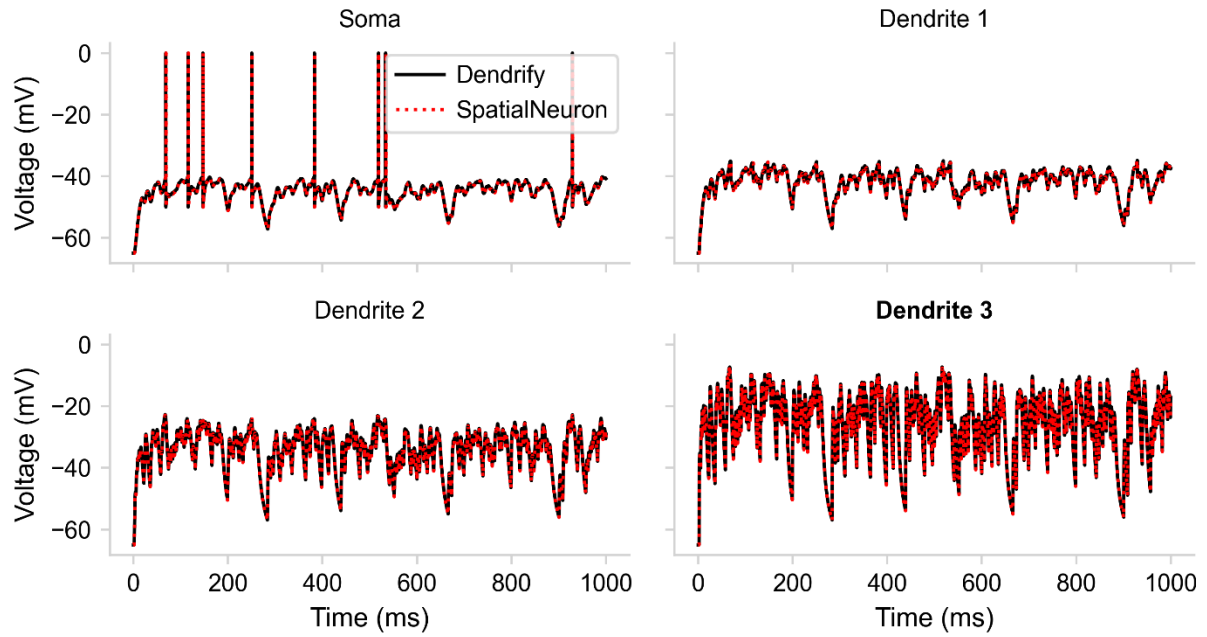

**Supplementary Figure 17 | Dendrify vs. SpatialNeuron when using dt = 0.1 ms and a 4<sup>th</sup>-order Runge-Kutta integration method.** Voltage responses of all model compartments when high-frequency synaptic input (300 Hz) is provided to the most distal dendrite.

## Supplementary Tables

| Supplementary Table 1   Parameters for the model shown in Figure 2 |                                                 |                                       |
|--------------------------------------------------------------------|-------------------------------------------------|---------------------------------------|
| Timestep                                                           | $dt$                                            | 0.1 ms                                |
| Specific membrane capacitance                                      | $C_m$                                           | $1 \mu\text{F} \cdot \text{cm}^{-2}$  |
| Specific leak conductance                                          | $g_L$                                           | $50 \mu\text{S} \cdot \text{cm}^{-2}$ |
| Axial resistance                                                   | $r_a$                                           | $150 \Omega \cdot \text{cm}$          |
| Resting potential (all compartments)                               | $V_{\text{rest}}$                               | -70 mV                                |
| Spiking threshold                                                  | $V_{\text{th}}$                                 | -40 mV                                |
| Voltage reset after spike                                          | $V_r$                                           | -50 mV                                |
| Refractory period after spike                                      | $t_{\text{ref}}$                                | 3 ms                                  |
| Length soma                                                        | $L_{\text{soma}}$                               | 25 $\mu\text{m}$                      |
| Diameter soma                                                      | $D_{\text{soma}}$                               | 25 $\mu\text{m}$                      |
| Length apical                                                      | $L_{\text{apical}}$                             | 250 $\mu\text{m}$                     |
| Diameter apical                                                    | $D_{\text{apical}}$                             | 2 $\mu\text{m}$                       |
| Length basal                                                       | $L_{\text{basal}}$                              | 150 $\mu\text{m}$                     |
| Diameter basal                                                     | $D_{\text{basal}}$                              | 2 $\mu\text{m}$                       |
| Area scale factor                                                  | $sf_{\text{area}}$                              | 3                                     |
| Spine area factor                                                  | $sf_{\text{spines}}$                            | 1.5                                   |
| Coupling conductance (soma-apical)                                 | $g_{\text{soma} \leftrightarrow \text{apical}}$ | 10 nS                                 |
| Coupling conductance (soma-basal)                                  | $g_{\text{soma} \leftrightarrow \text{basal}}$  | 10 nS                                 |
| Noise mean intensity                                               | $\mu_{\text{noise}}$                            | 0 pA                                  |
| Noise standard deviation                                           | $\sigma_{\text{noise}}$                         | 3 pA                                  |
| Noise time constant                                                | $\tau_{\text{noise}}$                           | 20 ms                                 |
| AMPA conductance                                                   | $g_{\text{AMPA}}$                               | 1 nS                                  |
| AMPA time constant                                                 | $\tau_{\text{AMPA}}$                            | 2 ms                                  |
| NMDA conductance                                                   | $g_{\text{NMDA}}$                               | 1 nS                                  |
| NMDA time constant                                                 | $\tau_{\text{NMDA}}$                            | 60 ms                                 |
| alpha (NMDA)                                                       | $\alpha$                                        | $0.062 \text{ mV}^{-1}$               |
| beta (NMDA)                                                        | $\beta$                                         | 3.57 mM                               |
| gamma (NMDA)                                                       | $\gamma$                                        | 0 mV                                  |
| AMPA / NMDA reversal potential                                     | $E_{\text{AMPA}} / E_{\text{NMDA}}$             | 0 mV                                  |

**Supplementary Table 2 | Parameters for the model shown in Figure 3**

|                                           |                                 |                                       |
|-------------------------------------------|---------------------------------|---------------------------------------|
| Timestep                                  | dt                              | 0.1 ms                                |
| Specific membrane capacitance             | $C_m$                           | $1 \mu\text{F} \cdot \text{cm}^{-2}$  |
| Specific leak conductance                 | $g_L$                           | $40 \mu\text{S} \cdot \text{cm}^{-2}$ |
| Axial resistance                          | $r_a$                           | $150 \Omega \cdot \text{cm}$          |
| Resting potential (all compartments)      | $V_{rest}$                      | -70 mV                                |
| Spiking threshold                         | $V_{th}$                        | -40 mV                                |
| 1 <sup>st</sup> voltage reset after spike | $V_{r1}$                        | 40 mV                                 |
| 2 <sup>nd</sup> voltage reset after spike | $V_{r1}$                        | -55 mV                                |
| Spike duration                            | $d_{AP}$                        | 0.5 ms                                |
| Refractory period after spike             | $t_{ref}$                       | 5 ms                                  |
| Length soma                               | $L_{soma}$                      | 25 $\mu\text{m}$                      |
| Diameter soma                             | $D_{soma}$                      | 25 $\mu\text{m}$                      |
| Length proximal                           | $L_{prox}$                      | 100 $\mu\text{m}$                     |
| Diameter proximal                         | $D_{prox}$                      | 2.5 $\mu\text{m}$                     |
| Length medial                             | $L_{med}$                       | 100 $\mu\text{m}$                     |
| Diameter medial                           | $D_{med}$                       | 1 $\mu\text{m}$                       |
| Length distal                             | $L_{dist}$                      | 100 $\mu\text{m}$                     |
| Diameter distal                           | $D_{dist}$                      | 0.5 $\mu\text{m}$                     |
| Area scale factor                         | $sf_{area}$                     | 2.8                                   |
| Spine area factor                         | $sf_{spines}$                   | 1.5                                   |
| Coupling conductance (soma-prox)          | $g_{soma \leftrightarrow prox}$ | 15 nS                                 |
| Coupling conductance (prox-med)           | $g_{prox \leftrightarrow med}$  | 10 nS                                 |
| Coupling conductance (med-dist)           | $g_{med \leftrightarrow dist}$  | 4 nS                                  |
| AMPA conductance                          | $g_{AMPA}$                      | 0.8 nS                                |
| AMPA time constant                        | $\tau_{AMPA}$                   | 2 ms                                  |
| NMDA conductance                          | $g_{NMDA}$                      | 0.8 nS                                |
| NMDA time constant                        | $\tau_{NMDA}$                   | 60 ms                                 |
| alpha (NMDA)                              | $\alpha$                        | $0.062 \text{ mV}^{-1}$               |
| beta (NMDA)                               | $\beta$                         | 3.57 mM                               |
| gamma (NMDA)                              | $\gamma$                        | 0 mV                                  |
| AMPA / NMDA reversal potential            | $E_{AMPA} / E_{NMDA}$           | 0 mV                                  |
| dSpike rise time constant                 | $\tau_{rise}$                   | 0.6 ms                                |
| dSpike fall time constant                 | $\tau_{decay}$                  | 1.2 ms                                |
| Refractory period after dSpike            |                                 | 5 ms                                  |
| Offset of dSpike fall                     |                                 | 0.2 ms                                |

**Supplementary Table 3 | Parameters for the CA1 PC model shown in Figure 4**

|                                            |                                                |                                       |
|--------------------------------------------|------------------------------------------------|---------------------------------------|
| Timestep                                   | dt                                             | 0.1 ms                                |
| Specific membrane capacitance              | $C_m$                                          | $1 \mu\text{F} \cdot \text{cm}^{-2}$  |
| Specific leak conductance                  | $g_L$                                          | $40 \mu\text{S} \cdot \text{cm}^{-2}$ |
| Axial resistance                           | $r_a$                                          | $120 \Omega \cdot \text{cm}$          |
| Resting potential (all compartments)       | $V_{\text{rest}}$                              | -65 mV                                |
| Spiking threshold                          | $V_{\text{th}}$                                | -47.5 mV                              |
| Subthreshold adaptation activation voltage | $V_a$                                          | -65 mV                                |
| Time constant of adaptation                | $\tau_a$                                       | 45 ms                                 |
| Max subthreshold adaptation conductance    | $g_a$                                          | 0.15 nS                               |
| Spike-triggered adaptation                 | $\Delta g_\alpha$                              | 21 nS                                 |
| 1 <sup>st</sup> voltage reset after spike  | $V_{r1}$                                       | 37.5 mV                               |
| 2 <sup>nd</sup> voltage reset after spike  | $V_{r1}$                                       | -53 mV                                |
| Spike duration                             | $d_{\text{AP}}$                                | 0.8 ms                                |
| Refractory period after spike              | $t_{\text{ref}}$                               | 4 ms                                  |
| Length soma                                | $L_{\text{soma}}$                              | 30 $\mu\text{m}$                      |
| Diameter soma                              | $D_{\text{soma}}$                              | 20 $\mu\text{m}$                      |
| Length trunk                               | $L_{\text{trunk}}$                             | 100 $\mu\text{m}$                     |
| Diameter trunk                             | $D_{\text{trunk}}$                             | 2 $\mu\text{m}$                       |
| Length medial                              | $L_{\text{med}}$                               | 150 $\mu\text{m}$                     |
| Diameter medial                            | $D_{\text{med}}$                               | 1.25 $\mu\text{m}$                    |
| Length distal                              | $L_{\text{dist}}$                              | 150 $\mu\text{m}$                     |
| Diameter distal                            | $D_{\text{dist}}$                              | 0.8 $\mu\text{m}$                     |
| Length oblique                             | $L_{\text{obl}}$                               | 100 $\mu\text{m}$                     |
| Diameter oblique                           | $D_{\text{obl}}$                               | 1 $\mu\text{m}$                       |
| Length basal                               | $L_{\text{bas}}$                               | 150 $\mu\text{m}$                     |
| Diameter basal                             | $D_{\text{bas}}$                               | 0.8 $\mu\text{m}$                     |
| Area scale factor                          | $sf_{\text{area}}$                             | 2.9                                   |
| Spine area factor                          | $sf_{\text{spines}}$                           | 1.5                                   |
| Coupling conductance (soma-basal)          | $g_{\text{soma} \leftrightarrow \text{basal}}$ | 3.8 nS                                |
| Coupling conductance (prox-trunk)          | $g_{\text{prox} \leftrightarrow \text{trunk}}$ | 22 nS                                 |
| Coupling conductance* (trunk-oblique)      | $g_{\text{trunk} \leftrightarrow \text{obl}}$  | 10.48 nS                              |
| Coupling conductance* (trunk-medial)       | $g_{\text{trunk} \leftrightarrow \text{med}}$  | 10.82 nS                              |
| Coupling conductance* (medial-distal)      | $g_{\text{med} \leftrightarrow \text{dist}}$   | 3.96 nS                               |
| AMPA reversal potential                    | $E_{\text{AMPA}}$                              | 0 mV                                  |
| AMPA time constant                         | $\tau_{\text{AMPA}}$                           | 2 ms                                  |

|                                |                  |                          |
|--------------------------------|------------------|--------------------------|
| AMPA conductance distal        | $g_{AMPA\_dist}$ | 0.81 nS                  |
| AMPA conductance medial        | $g_{AMPA\_med}$  | 0.81 nS                  |
| AMPA conductance oblique       | $g_{AMPA\_ob}$   | 0.6 nS                   |
| AMPA conductance basal         | $g_{AMPA\_bas}$  | 0.6 nS                   |
| NMDA reversal potential        | $E_{NMDA}$       | 0.35 mV                  |
| NMDA time constant             | $\tau_{NMDA}$    | 60 ms                    |
| NMDA conductance distal        | $g_{AMPA\_dist}$ | 0.81 nS                  |
| NMDA conductance medial        | $g_{AMPA\_med}$  | 0.4 nS                   |
| NMDA conductance oblique       | $g_{AMPA\_ob}$   | 0.4 nS                   |
| NMDA conductance basal         | $g_{AMPA\_bas}$  | 0.4 nS                   |
| Magnesium concentration        | $[Mg^{2+}]_o$    | 1                        |
| alpha (NMDA)                   | $\alpha$         | 0.087 mV <sup>-1</sup>   |
| beta (NMDA)                    | $\beta$          | 3.57 mM                  |
| gamma (NMDA)                   | $\gamma$         | 10 mV                    |
| Sodium reversal potential      | $E_{Na}$         | 50 mV                    |
| Potassium reversal potential   | $E_K$            | -90 mV                   |
| dSpike threshold               |                  | -42.5 mV                 |
| dSpike rise time constant      |                  | 0.5 ms                   |
| dSpike fall time constant      |                  | 1.2 ms                   |
| Refractory period after dSpike |                  | 4.2 ms                   |
| Offset of dSpike fall          |                  | 0.6 ms                   |
| Sodium channels conductance    | $g_{Na}$         | 10 mS · cm <sup>-2</sup> |
| Potassium channels conductance | $g_K$            | 4 mS · cm <sup>-2</sup>  |

\*Value generated by *Dendrifly*



#### Supplementary Table 4 | Details for the benchmark test shown in Figure 6

|                    |                                                   |
|--------------------|---------------------------------------------------|
| Neuron model       | 4-compartment model adapted from <b>Fig. 3</b>    |
| External input     | 2 Poisson generators per neuron (50 Hz each)      |
| Synapses           | AMPA (instant rise, $\tau_{\text{decay}} = 5$ ms) |
| Simulated time     | 1 second                                          |
| Timestep (dt)      | 0.1 ms                                            |
| Integration method | Forward Euler                                     |
| Operating system   | Ubuntu 22.04.1                                    |
| Brian version      | 2.5.1                                             |
| Dendriify version  | 1.0.5                                             |
| CPU                | i7-9750H                                          |
| RAM                | 16 GB                                             |
| Software           | Jupyter notebook (%%timeit)                       |
| Brian mode         | NumPy                                             |
| Test               | Combined build + runtime (mean of 10 runs)        |
| iPad specs         | 2022 iPad Air with M1 processor & 8 GB of RAM     |
| iPad software      | iPad OS 16.1 & the <a href="#">Carnets app</a>    |

## Supplementary References

1. Masurkar, A. V. *et al.* Postsynaptic integrative properties of dorsal CA1 pyramidal neuron subpopulations. *J. Neurophysiol.* (2020) doi:10.1152/JN.00397.2019.
2. Golding, N. L., Mickus, T. J., Katz, Y., Kath, W. L. & Spruston, N. Factors mediating powerful voltage attenuation along CA1 pyramidal neuron dendrites. *J. Physiol.* (2005) doi:10.1113/jphysiol.2005.086793.
3. Jarsky, T., Roxin, A., Kath, W. L. & Spruston, N. Conditional dendritic spike propagation following distal synaptic activation of hippocampal CA1 pyramidal neurons. *Nat. Neurosci.* (2005) doi:10.1038/nn1599.
4. Mascagni, M. V & Sherman, A. S. Numerical Methods for Neuronal Modeling. *Methods* (1989).
